# Supplementary material for: A junction branch point adjacent to a DNA backbone nick directs substrate cleavage by Saccharomyces cerevisiae Mus81-Mms4
Source: PubMed Central journal article supplement — Nucleic Acids Res. 2009 Feb 11;37(6):2026–36. doi: 10.1093/nar/gkp038 (PMC2665226; doi:10.1093/nar/gkp038), 2009-02-11
Supplement: gkp038_1.pdf [file gkp038_1.pdf]

## Supplemental Data

### A JUNCTION BRANCH POINT ADJACENT TO A DNA BACKBONE NICK DIRECTS SUBSTRATE CLEAVAGE BY *SACCHAROMYCES CEREVISIAE* MUS81-MMS4

Kirk Tevebaugh Ehmsen & Wolf-Dietrich Heyer

**Supplemental Table 1. Mus81-Mms4 kinetic parameters on 3'-FL-related DNA joint molecules.**

| Substrate          | $V_{max}$<br>( $nM\ min^{-1}$ ) | $K_M$<br>( $nM$ ) | $k_{cat}$<br>( $min^{-1}$ ) | catalytic<br>cycle<br>(min.) | $k_{cat}/K_M$<br>( $nM^{-1}\ min^{-1}$ ) |
|--------------------|---------------------------------|-------------------|-----------------------------|------------------------------|------------------------------------------|
| 3'-FL-2 nt         | $3.5 \pm 0.85$                  | $11.9 \pm 5.6$    | .7                          | 1.43                         | .06                                      |
| 3'-FL-1 nt         | $2.9 \pm 0.48$                  | $5.3 \pm 2.7$     | .58                         | 1.72                         | .11                                      |
| 3'-FL <sup>2</sup> | $4.9 \pm 0.7$                   | $5.5 \pm 2.6$     | .98                         | 1.02                         | .18                                      |
| 3'-FL+1 nt         | $1.8 \pm 0.33$                  | $7.4 \pm 3$       | .36                         | 2.78                         | .05                                      |
| 3'-FL+2 nt         | $0.88 \pm 0.08$                 | $2.7 \pm 1.1$     | .18                         | 5.56                         | .07                                      |
| 3'-FL+3 nt         | $0.21 \pm 0.05$                 | $20.9 \pm 12.1$   | .04                         | 25                           | .002                                     |
| Y <sup>1</sup>     | $1.3 \pm 0.04$                  | $30.4 \pm 11.3$   | .26                         | 3.85                         | .009                                     |

<sup>1</sup> from: Ehmsen, K.T. and Heyer, W.D. (2008) *Saccharomyces cerevisiae* Mus81-Mms4 is a catalytic structure-selective endonuclease. *Nucleic Acids Res.*, **36**, 2182-2195.

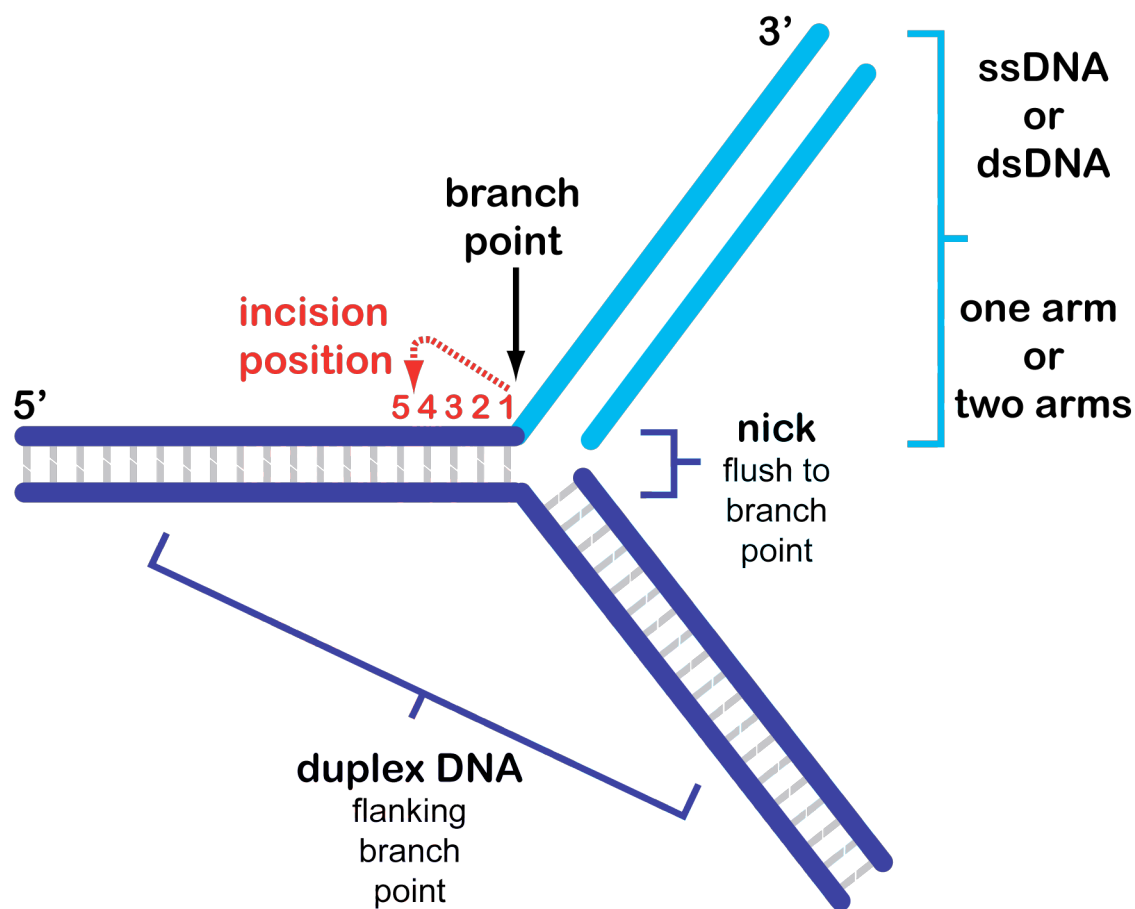

**Supplemental Figure 1. Model for substrate branch point properties queried by Mus81-Mms4 during DNA joint molecule processing.** Mus81-Mms4 incises a number of model joint molecule structures *in vitro*, which in principle can be described from the perspective of a branch point centered at a nick in duplex DNA. One or two arms of either single-stranded (ssDNA) or double-stranded (dsDNA) character can emerge from this branch point (depicted in *light blue*). At least two duplex arms flanking the branch point must be double-stranded DNA for optimal substrate binding (*dark blue*). For optimal substrate turnover, the 5'-end of the downstream duplex DNA must meet the substrate branch point such that it is flush to the branch point [neither retreated (leaving a gap) or advanced (presenting a short 3'-flap)]. Incision occurs 5' to the substrate branch point, on the discontinuous strand between the fourth and fifth phosphodiester bonds as referenced from the branch point position (shown in *red*, with

phosphodiester bonds numbered right to left from the substrate branch point as depicted). The substrate recognition features discussed here are consistent with previous analyses of Mus81-Mms4/Eme1 from budding yeast (1-7), fission yeast (3,4,6,8-10) and humans (11-15), suggesting that the substrate preference might be conserved between these enzymes. As discussed more fully in the text, there is a discrepancy in the mapping of the cleavage sites between our and two previous studies (2,3) that appears to be enzyme-dependent, as identical substrates were used.

### SUPPLEMENTAL REFERENCES

1. Kaliraman, V., Mullen, J.R., Fricke, W.M., Bastin-Shanower and Brill, S.J. (2001) Functional overlap between Sgs1-Top3 and the Mms4-Mus81 endonuclease. *Genes Dev.*, **15**, 2730-2740.
2. Bastin-Shanower, S.A., Fricke, W.M., Mullen, J.R. and Brill, S.J. (2003) The mechanism of Mus81-Mms4 cleavage site selection distinguishes it from the homologous endonuclease Rad1-Rad10. *Mol. Cell. Biol.*, **23**, 3487-3496.
3. Osman, F., Dixon, J., Doe, C.L. and Whitby, M.C. (2003) Generating crossovers by resolution of nicked Holliday junctions: A role of Mus81-Eme1 in meiosis. *Mol. Cell*, **12**, 761-774.
4. Whitby, M.C., Osman, F. and Dixon, J. (2003) Cleavage of model replication forks by fission yeast Mus81-Eme1 and budding yeast Mus81-Mms4. *J. Biol. Chem.*, **278**, 6928-6935.
5. Fricke, W.M., Bastin-Shanower, S.A. and Brill, S.J. (2005) Substrate specificity of the *Saccharomyces cerevisiae* Mus81-Mms4 endonuclease. *DNA Repair*, **4**, 243-251.
6. Gaskell, L.J., Osman, F., Gilbert, R.J. and Whitby, M.C. (2007) Mus81 cleavage of Holliday junctions: a failsafe for processing meiotic recombination intermediates? *EMBO J.*, **26**, 1891-1901.
7. Ehmsen, K.T. and Heyer, W.D. (2008) *Saccharomyces cerevisiae* Mus81-Mms4 is a catalytic structure-selective endonuclease. *Nucleic Acids Res.*, **36**, 2182-2195.
8. Doe, C.L., Ahn, J.S., Dixon, J. and Whitby, M.C. (2002) Mus81-Eme1 and Rqh1 involvement in processing stalled and collapsed replication forks. *J. Biol. Chem.*, **277**, 32753-32759.
9. Gaillard, P.-H., Noguchi, E., Shanahan, P. and Russell, P. (2003) The endogenous Mus81-Eme1 complex resolves Holliday junctions by a nick and counternick mechanism. *Mol. Cell*, **12**, 747-759.
10. Boddy, M.N., Gaillard, P.-H.L., McDonald, W.H., Shanahan, P., Yates, J.R. and Russell, P. (2001) Mus81-Eme1 are essential components of a Holliday junction resolvase. *Cell*, **107**, 537-548.
11. Ciccica, A., Constantinou, A. and West, S.C. (2003) Identification and characterization of the human Mus81/Eme1 endonuclease. *J. Biol. Chem.*, **278**, 25172-25178.
12. Ogrunc, M. and Sancar, A. (2003) Identification and characterization of human MUS81-MMS4 structure-specific endonuclease. *J. Biol. Chem.*, **278**, 21715-21720.
13. Chang, J.H., Kim, J.J., Choi, J.M., Lee, J.H. and Cho, Y.J. (2008) Crystal structure of the Mus81-Eme1 complex. *Genes Dev.*, **22**, 1093-1106.
14. Taylor, E.R. and McGowan, C.H. (2008) Cleavage mechanism of human Mus81-Eme1 acting on Holliday-junction structures. *Proc Natl Acad Sci U S A*, **105**, 3757-3762.
15. Chen, X.-B., Melchionna, R., Denis, C.-M., Gaillard, P.-H.L., Blasina, A., Van de Weyer, I., Boddy, M.N., Russell, P., Vialard, J. and McGowan, C.H. (2001) Human Mus81-associated endonuclease cleaves Holliday junctions *in vitro*. *Mol. Cell*, **8**, 1117-1127.
